# Supplementary material
Source: Springer Nature journal article supplement (https://www.springermedizin.de/resource/supplementary/13075_2010_9739_MOESM7_ESM.pdf/9693592)

GLIADIN

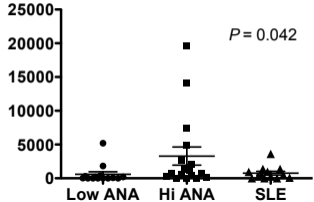

SK-N-SH

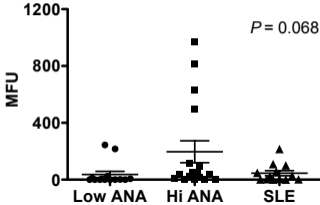

JURKAT T

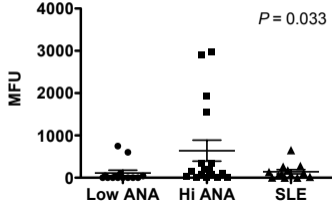

Supplement: MOESM7 [file 9693592]
